# Supplementary material
Source: Springer Nature journal article supplement (https://www.springermedizin.de/resource/supplementary/13048_2013_146_MOESM4_ESM.pdf/9665000)

**A**

Undifferentiated GCs

CTL      STS

shPHB    -    +    -    +

Intact Caspase-3

Cleaved Caspase-3

PHB

Actin

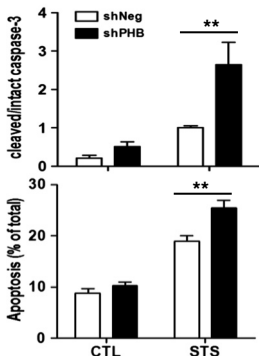**B**

Differentiated GCs

CTL      STS

shPHB    -    +    -    +

Intact Caspase-3

Cleaved Caspase-3

PHB

Actin

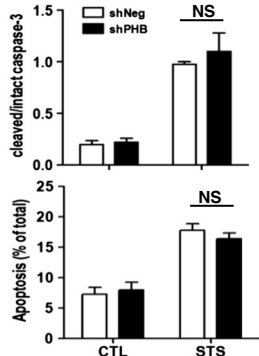

Supplement: MOESM4 [file 9665000]
